# Supplementary material for: The stability of 65 biochemistry analytes in plasma, serum, and whole blood
Source: publisher site journal article supplement (doi:10.1515/cclm-2023-1192), 2024-03-05
Supplement: Supplementary file 1 [file j_cclm-2023-1192_suppl_003.docx]

**Supplemental Figure 1. Whole blood stability of biochemical analytes collected in lithium heparin, stored at room temperature (RT) for 8-hours and analyzed on the Werfen GEM Premier 5000 blood gas analyzer.** The percent deviation (%PD) at 8-hours is shown for each volunteer (n=5) and is indicated by the dark grey circles. The positive and negative MPI limits are indicated by the black horizontal lines for each analyte.
